# Supplementary material for: Monitoring Water Absorption and Desorption in Untreated and Consolidated Tuff by a Non-Invasive Graphene-Based Humidity Sensor
Source: MDPI journal article supplement (doi:10.3390/ma16051878), 2023-02-24
Supplement: s1 [file s1]

## Supplementary Information

# Monitoring Water Absorption and Desorption in Untreated and Consolidated Tuff by a Non-Invasive Graphene-Based Humidity Sensor

Federico Olivieri <sup>1</sup>, Rachele Castaldo <sup>1</sup>, Gennaro Gentile <sup>1,\*</sup> and Marino Lavorgna <sup>2</sup>

<sup>1</sup> Institute of Polymers, Composites and Biomaterials, National Research Council of Italy,  
Via Campi Flegrei 34, 80078 Pozzuoli, Italy

<sup>2</sup> Institute of Polymers, Composites and Biomaterials, National Research Council of Italy,  
P.le E. Fermi 1, 80055 Portici, Italy

\* Correspondence: gennaro.gentile@cnr.it

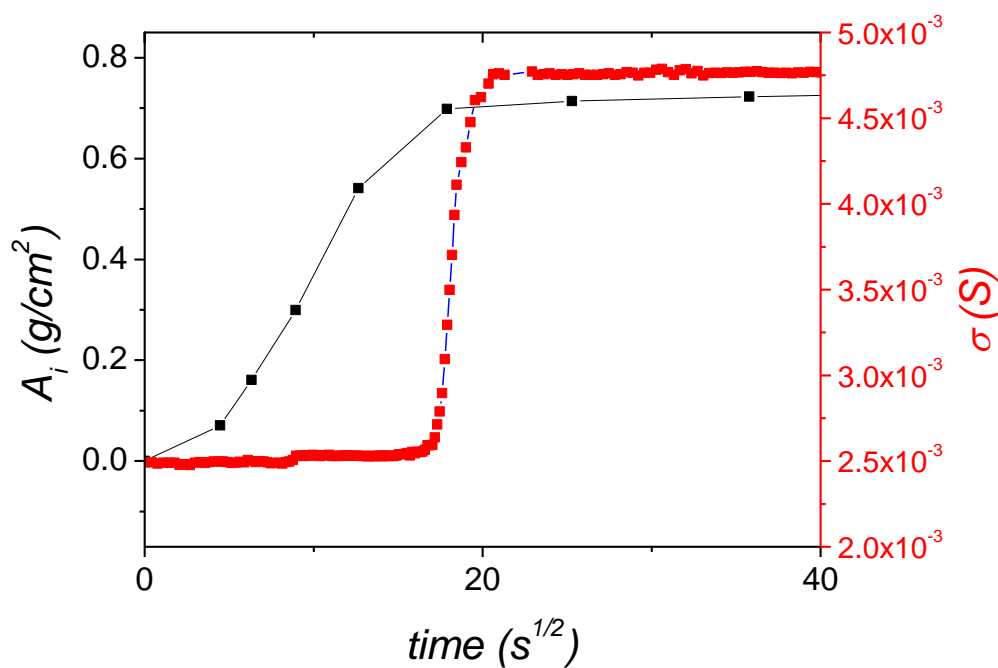

Figure S1. Overlapped plot of the amount of absorbed water  $A_i$  and the surface conductivity in the first part of the experiment.

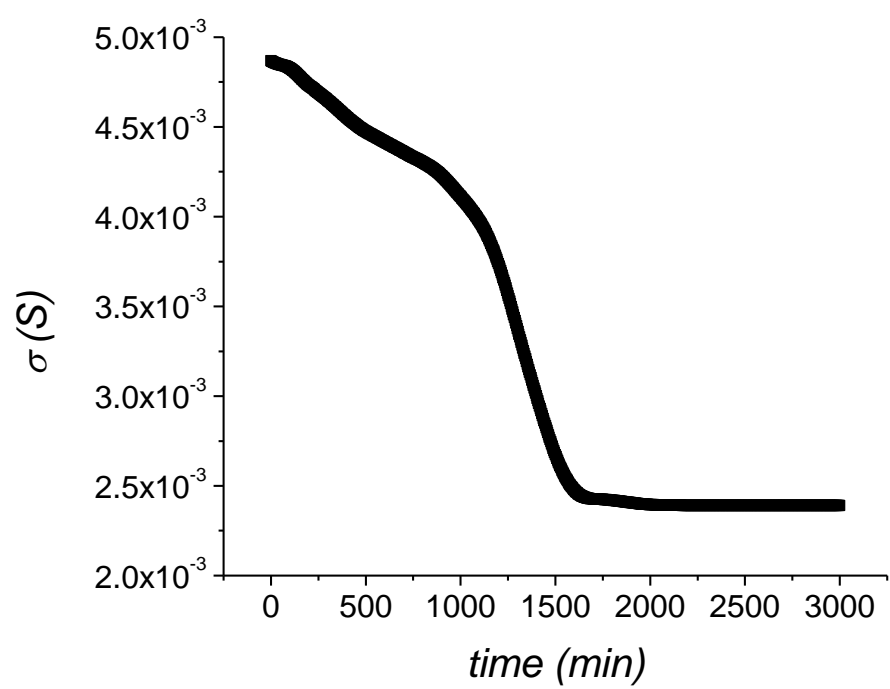

Figure S2. Surface conductivity of the sensor, applied with a thicker HAVOH adhesive layer on the untreated TUFF sample, during the drying test.
